# Supplementary material for: Oxidation of graphene with variable defects: alternately symmetrical escape and self-restructuring of carbon rings
Source: Royal Society of Chemistry journal article supplement (doi:10.1039/c9nr10613h), 2020-01-01
Supplement: c9nr10613h1.pdf [file c9nr10613h1.pdf]

## Supplementary Information for

### **Oxidation of Graphene with Variable Defects: Alternately Symmetrical Escape and Self-restructuring of Carbon Rings**

Peiru Zheng<sup>1</sup>, Xingfan Zhang<sup>1</sup>, Yunrui Duan<sup>1</sup>, Meng Yan<sup>1</sup>, Robert Chapman<sup>2</sup>, Yanyan Jiang<sup>\*,1</sup>, Hui Li<sup>\*,1</sup>

<sup>1</sup>Key Laboratory for Liquid-Solid Structural Evolution and Processing of Materials, Ministry of Education, Shandong University, Jinan 250061, People's Republic of China

<sup>2</sup>School of Chemistry, University of New South Wales, Sydney, NSW 2052, Australia

\* Corresponding author:

[yanyan.jiang@sdu.edu.cn](mailto:yanyan.jiang@sdu.edu.cn) (Y. J.); [lihuilmy@hotmail.com](mailto:lihuilmy@hotmail.com) (H. L.)

**This PDF file includes:**

Figure S1 to S6

Caption for Video S1

Figure S1 to S6

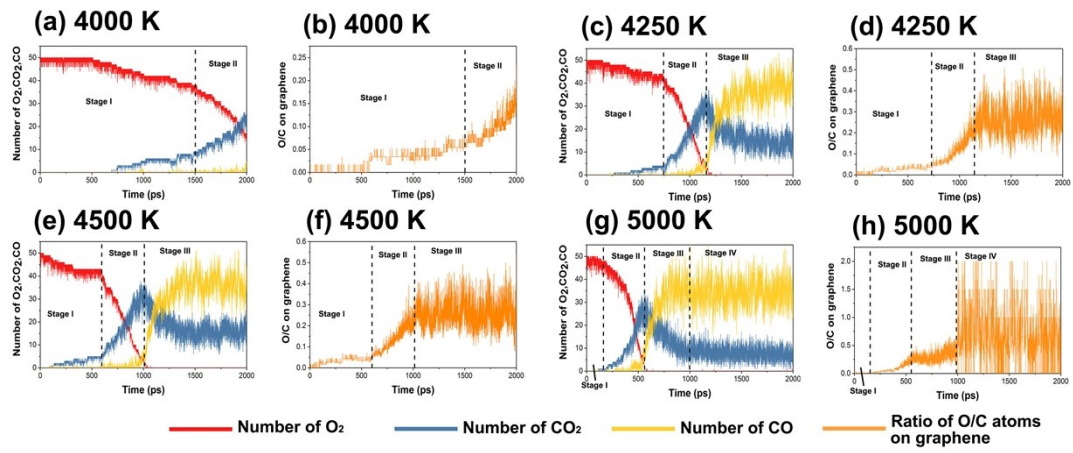

Figure S1. Quantity changes of gases and ratio of O/C on the SVD graphene within 2 ps at (a) (b) 4000 K (c) (d) 4250 K (e) (f) 4500 K (g) (h) 5000 K.

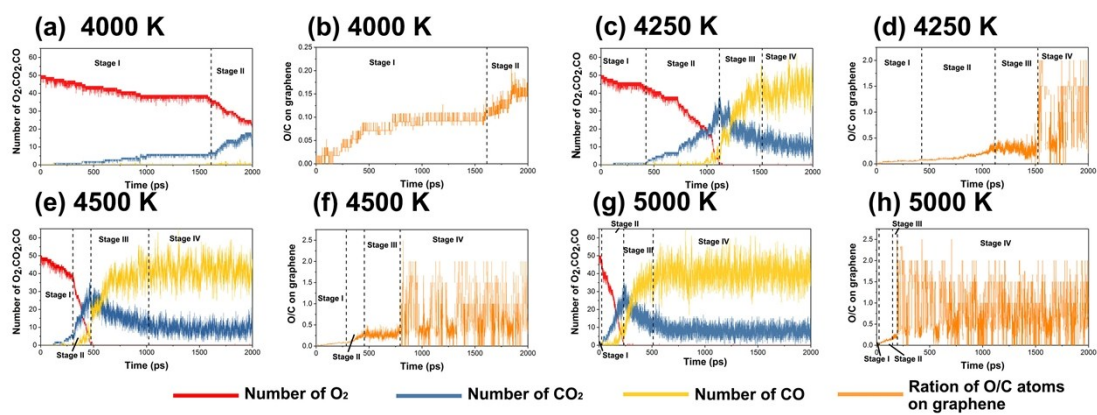

Figure S2. Quantity changes of gases and ratio of O/C on the MVD graphene within 2 ps at (a) (b) 4000 K (c) (d) 4250 K (e) (f) 4500 K (g) (h) 5000 K.

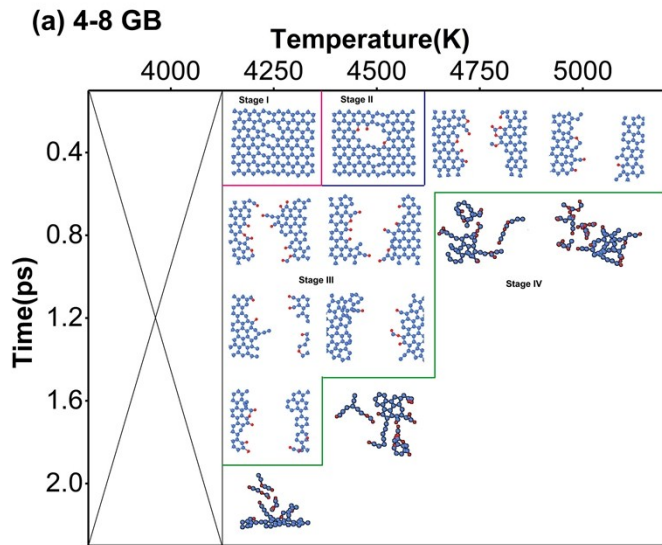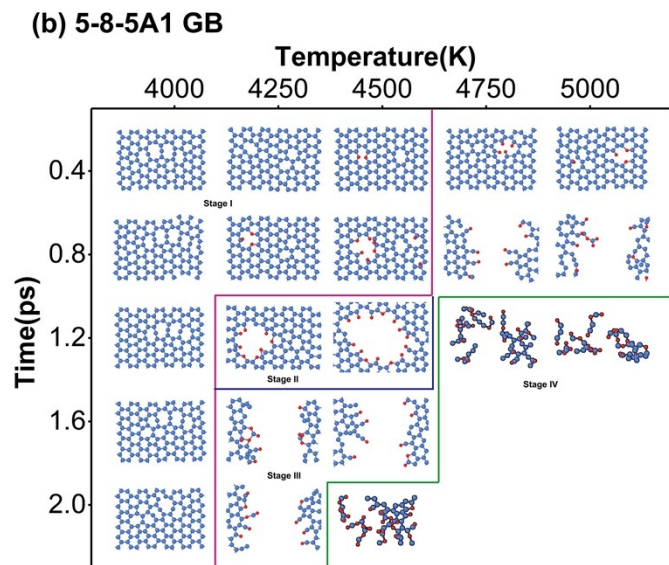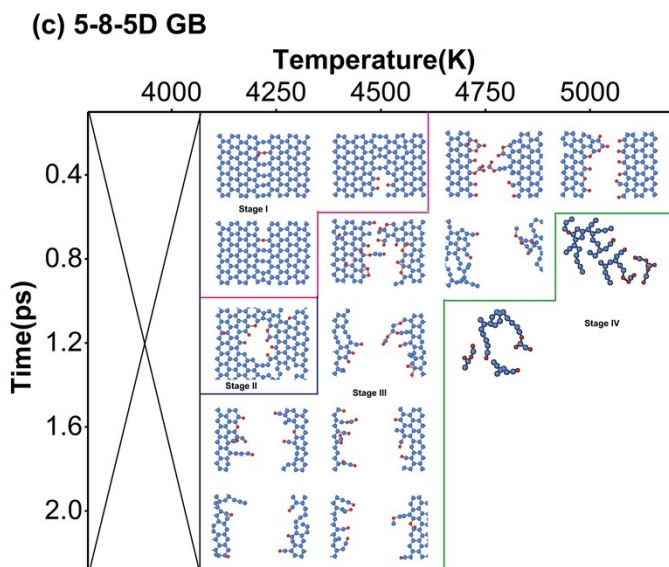

Figure S3. Structural phase diagram of the (a) 4-8 GB graphene (b) 5-8-5A1 GB graphene and (c) 5-8-5D GB graphene oxidation stage. Stages are separated from each other by full lines with different colors. 4-8 GB and 5-8-5D graphene sheets were not oxidized at 4000 K within 2 ps so that we filled the corresponding part of the diagram with an “X”.

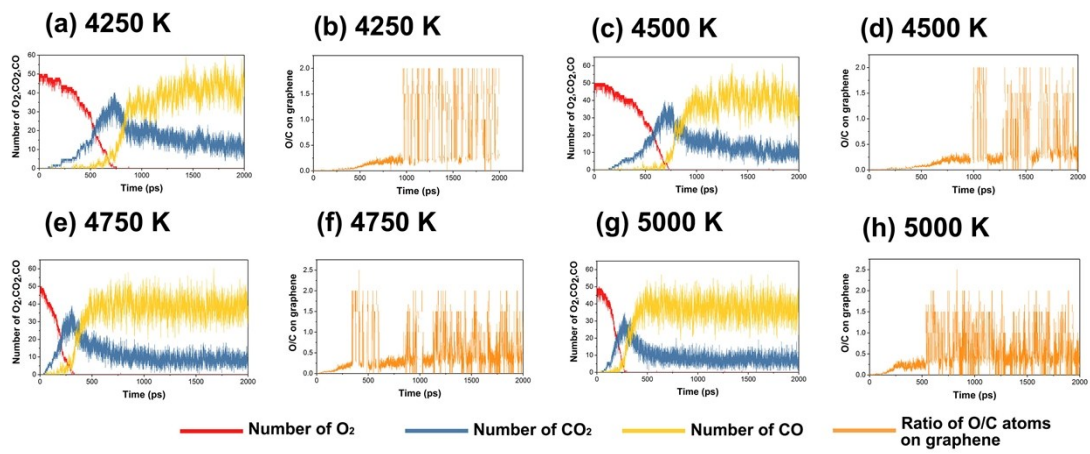

Figure S4. Quantity changes of gases and ratio of O/C on the 4-8 GB graphene within 2 ps at (a) (b) 4250 K (c) (d) 4500 K (e) (f) 4750 K (g) (h) 5000 K.

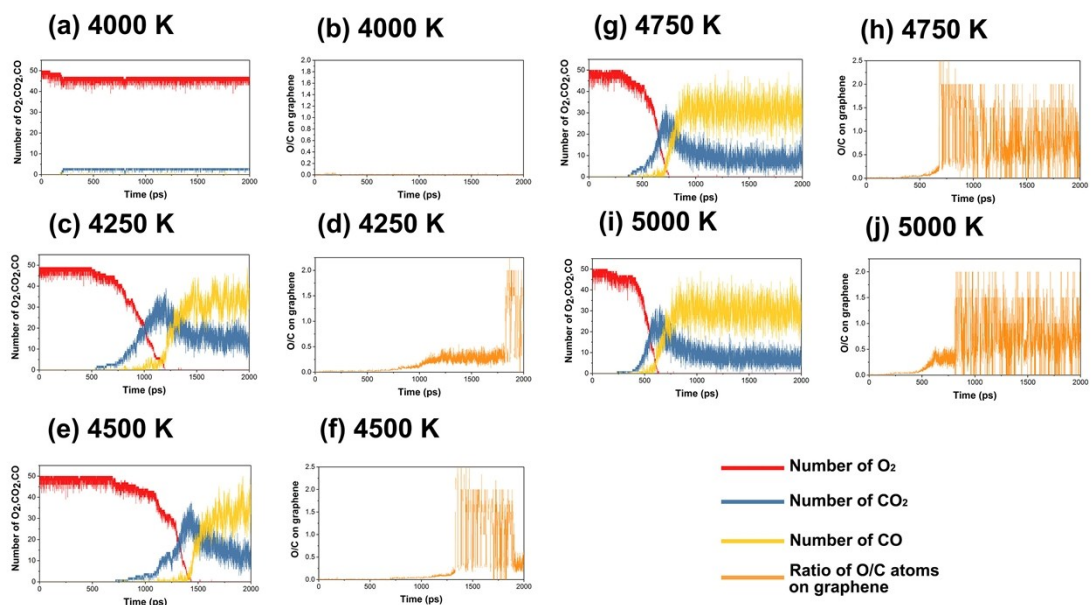

Figure S5. Quantity changes of gases and ratio of O/C on the 5-8-5A1 GB graphene within 2 ps at (a) (b) 4250 K (c) (d) 4250 K (e) (f) 4500 K (g) (h) 4750 K (i) (j) 5000 K.

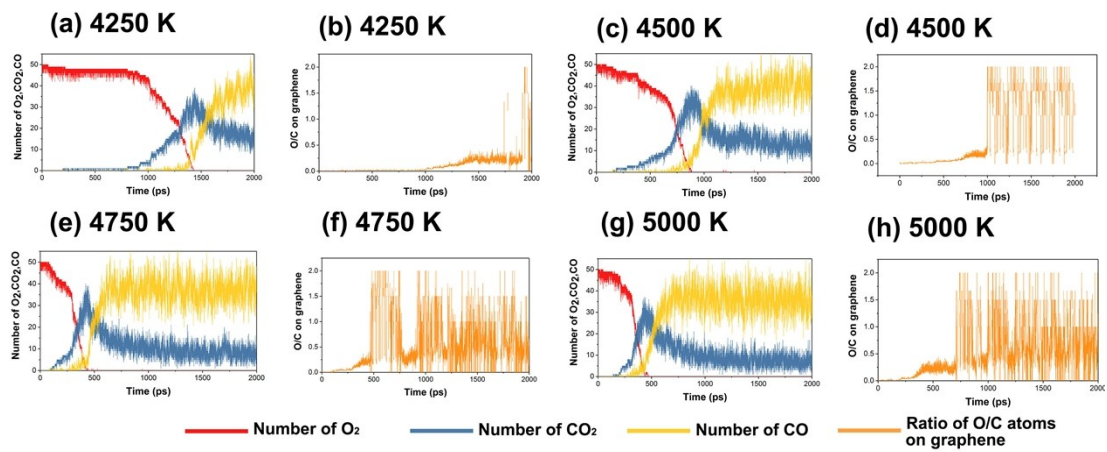

Figure S6. Quantity changes of gases and ratio of O/C on the 5-8-5D GB graphene within 2 ps at (a) (b) 4250 K (c) (d) 4500 K (e) (f) 4750 K (g) (h) 5000 K.



### **Caption for Video S1**

**Video S1.** Symmetrical escape of C atoms in stage I on SVD graphene. During stage I on the SVD graphene, we found the symmetry of the vacancy was preserved
